# Supplementary material
Source: PubMed Central journal article supplement (PMC7717170)
Supplement: NIHMS1624029-supplement-Supplemental_Digital_Content_1.pdf [file NIHMS1624029-supplement-Supplemental_Digital_Content_1.pdf]

## Supplemental Digital Content 1

Development and testing of compatible ICD-9-CM and ICD-10-CM diagnosis code lists for the Functional Comorbidity Index

Sears JM, Rundell SD

**SUPPLEMENTAL TABLE S1. Concordance of Individual FCI Conditions and FCI (count of conditions) by ICD Lexicon**

| FCI condition                             | Data source                                                    |             |                      |       |      |                                                                                            |             |                      |       |      |
|-------------------------------------------|----------------------------------------------------------------|-------------|----------------------|-------|------|--------------------------------------------------------------------------------------------|-------------|----------------------|-------|------|
|                                           | Dual-coded Washington State hospital discharge data (ages 18+) |             |                      |       |      | Washington State workers' compensation data for allowed work-related conditions (ages 18+) |             |                      |       |      |
|                                           | (N=2,351)                                                      |             |                      |       |      | (N=6,528)                                                                                  |             |                      |       |      |
|                                           | N cases*                                                       | Agreement % | Expected agreement % | Kappa | SE   | N cases*                                                                                   | Agreement % | Expected agreement % | Kappa | SE   |
| Arthritis                                 | 235                                                            | 97.92       | 83.68                | 0.87  | 0.02 | 202                                                                                        | 98.85       | 95.08                | 0.77  | 0.01 |
| Osteoporosis                              | 91                                                             | 99.70       | 92.83                | 0.96  | 0.02 | 0 <sup>†</sup>                                                                             | NC          | NC                   | NC    | NC   |
| Asthma                                    | 208                                                            | 99.45       | 84.33                | 0.96  | 0.02 | 2 <sup>‡</sup>                                                                             | NS          | NS                   | NS    | NS   |
| Chronic respiratory disease               | 257                                                            | 98.38       | 81.80                | 0.91  | 0.02 | 1 <sup>‡</sup>                                                                             | NS          | NS                   | NS    | NS   |
| Angina                                    | 28                                                             | 99.02       | 98.60                | 0.30  | 0.01 | 0 <sup>†</sup>                                                                             | NC          | NC                   | NC    | NC   |
| Congestive heart failure or heart disease | 551                                                            | 97.58       | 65.41                | 0.93  | 0.02 | 0 <sup>†</sup>                                                                             | NC          | NC                   | NC    | NC   |
| Myocardial infarction                     | 228                                                            | 98.81       | 83.45                | 0.93  | 0.02 | 1 <sup>‡</sup>                                                                             | NS          | NS                   | NS    | NS   |
| Neurological disease                      | 171                                                            | 99.74       | 86.73                | 0.98  | 0.02 | 6 <sup>‡</sup>                                                                             | NS          | NS                   | NS    | NS   |
| Stroke or transient ischemic attack       | 116                                                            | 99.79       | 90.81                | 0.98  | 0.02 | 3 <sup>‡</sup>                                                                             | NS          | NS                   | NS    | NS   |
| Peripheral vascular disease               | 97                                                             | 99.74       | 92.32                | 0.97  | 0.02 | 0 <sup>†</sup>                                                                             | NC          | NC                   | NC    | NC   |
| Diabetes                                  | 489                                                            | 99.49       | 67.35                | 0.98  | 0.02 | 2 <sup>‡</sup>                                                                             | NS          | NS                   | NS    | NS   |
| Upper gastrointestinal disease            | 513                                                            | 99.36       | 66.24                | 0.98  | 0.02 | 3 <sup>‡</sup>                                                                             | NS          | NS                   | NS    | NS   |
| Depression                                | 424                                                            | 98.00       | 71.72                | 0.93  | 0.02 | 250                                                                                        | 99.30       | 93.29                | 0.90  | 0.01 |
| Anxiety or panic disorder                 | 308                                                            | 98.85       | 78.08                | 0.95  | 0.02 | 133                                                                                        | 99.62       | 96.38                | 0.89  | 0.01 |
| Visual impairment                         | 19                                                             | 99.87       | 98.52                | 0.91  | 0.02 | 2 <sup>‡</sup>                                                                             | NS          | NS                   | NS    | NS   |
| Hearing impairment                        | 133 <sup>§</sup>                                               | NS          | NS                   | NS    | NS   | 6 <sup>‡</sup>                                                                             | NS          | NS                   | NS    | NS   |
| Back disease                              | 94                                                             | 99.36       | 92.91                | 0.91  | 0.02 | 468                                                                                        | 98.67       | 87.84                | 0.89  | 0.01 |
| Obesity                                   | 381                                                            | 99.70       | 73.04                | 0.99  | 0.02 | 0 <sup>†</sup>                                                                             | NC          | NC                   | NC    | NC   |
| FCI (count of conditions)                 | NA <sup>  </sup>                                               | 86.52       | 20.06                | 0.83  | 0.01 | NA <sup>¶</sup>                                                                            | 96.52       | 77.24                | 0.85  | 0.01 |

Kappa interpretation: Values  $\leq 0$  indicate no agreement, 0.01–0.20 indicate none to slight, 0.21–0.40 indicate fair, 0.41–0.60 indicate moderate, 0.61–0.80 indicate substantial, and 0.81–1.00 indicate almost perfect agreement. P-values were uniformly  $<.00005$ .

\*Number of cases identified by either lexicon

<sup>†</sup>Kappa not calculated (NC) due to 0 cases identified by either lexicon.

<sup>‡</sup>Kappa not shown (NS) due to very few cases identified by either lexicon.

<sup>§</sup>Although there were adequate cases, kappa is not shown (NS); on inspection, it was clear that hearing impairment had not been fully coded in this data set.

<sup>||</sup>The FCI had 11 categories (0 to 10).

<sup>¶</sup>The FCI had 4 categories (0 to 3).

FCI indicates Functional Comorbidity Index; ICD, International Classification of Diseases; N, number; NA, not applicable; NC, not calculated; NS, not shown; SE, standard error.

**SUPPLEMENTAL TABLE S2. Process, Decision Rules, and Rationale Guiding Development of Functional Comorbidity Index (FCI) ICD-9-CM and ICD-10-CM Diagnosis Code Lists**

| <b>FCI category</b> | <b>Process/decision</b>                                                                                                                                                                                                                                                                                                                                                                                                                                                                                                                                                                                                                                               |
|---------------------|-----------------------------------------------------------------------------------------------------------------------------------------------------------------------------------------------------------------------------------------------------------------------------------------------------------------------------------------------------------------------------------------------------------------------------------------------------------------------------------------------------------------------------------------------------------------------------------------------------------------------------------------------------------------------|
| Overall             | Started with published FCI code lists, including the ICD-9-CM code lists developed by Kumar et al (2016), <sup>11</sup> and the ICD-10-AM code list developed by Gabbe et al (2013). <sup>16</sup> We also obtained unpublished ICD-9-CM and ICD-10-CM code lists used by Marcum et al (2018). <sup>14</sup> Where there were discrepancies between these existing lists, we used Groll et al (2005) <sup>10</sup> to guide decisions based on original intent, scope, and FCI category descriptions. We also reviewed the FCI literature (including later articles co-authored by Groll <sup>23-25</sup> ) to check for conceptual/definitional drift or refinement. |
| Overall             | Reviewed Charlson and Elixhauser ICD-9-CM and ICD-10 comorbidity code lists published by Quan et al (2005), <sup>9</sup> and added codes as indicated. The FCI focus on chronic conditions was intentionally maintained; i.e., acute condition codes were not added. (The FCI was developed to predict long-term functional status, while the Charlson and Elixhauser tools were developed for case-mix adjustment.)                                                                                                                                                                                                                                                  |
| Overall             | Aimed to optimize concordance between codes included on the ICD-9-CM and ICD-10-CM lists, in order to facilitate (1) measurement continuity across the lexicon change and (2) use of data sets involving both lexicons.                                                                                                                                                                                                                                                                                                                                                                                                                                               |
| Overall             | Using code manuals for both lexicons <sup>27-29</sup> and the American Academy of Professional Coders online code converter, <sup>30</sup> translated and back-translated all codes between ICD-9-CM and ICD-10-CM, and made adjustments to ensure concordance across lexicons.                                                                                                                                                                                                                                                                                                                                                                                       |
| Overall             | Avoided expanding definitions where feasible. For example, neck was excluded from the back/degenerative disc disease category, due to differential impact on work disability and the presentation in Groll et al (2005) <sup>10</sup> of back pain as the condition that was originally validated; in contrast, Gabbe et al (2013) <sup>16</sup> modified this category to include degenerative disc disease whether neck or back. Some minor definitional expansions were necessary to ensure concordance across lexicons.                                                                                                                                           |
| Overall             | Focused on chronic comorbidity codes, and did not include codes for acute/subacute conditions (unless a particular diagnosis usually involved relevant long-term sequelae).                                                                                                                                                                                                                                                                                                                                                                                                                                                                                           |
| Overall             | Focused on comorbidities affecting adults, but included some juvenile disease codes when likely to persist into adulthood (e.g., diabetes, rheumatoid arthritis).                                                                                                                                                                                                                                                                                                                                                                                                                                                                                                     |
| Overall             | To the extent feasible, included diagnosis-based rather than symptom-based codes per Groll et al (2005). <sup>10</sup>                                                                                                                                                                                                                                                                                                                                                                                                                                                                                                                                                |
| Overall             | Did not include codes for complications when the code manual specified that the underlying disease should also be coded.                                                                                                                                                                                                                                                                                                                                                                                                                                                                                                                                              |
| Overall             | Did not list the same code in more than one FCI category.                                                                                                                                                                                                                                                                                                                                                                                                                                                                                                                                                                                                             |

|                                                                                                                 |                                                                                                                                                                                                                                                                                                                                                                                                                                                                                                                                                                                                                                                                                                                                                                                                                                         |
|-----------------------------------------------------------------------------------------------------------------|-----------------------------------------------------------------------------------------------------------------------------------------------------------------------------------------------------------------------------------------------------------------------------------------------------------------------------------------------------------------------------------------------------------------------------------------------------------------------------------------------------------------------------------------------------------------------------------------------------------------------------------------------------------------------------------------------------------------------------------------------------------------------------------------------------------------------------------------|
| Overall                                                                                                         | Generally, did not list codes that were a common result of certain conditions, but where underlying cause was undetermined (e.g., did not include thrombosis codes in the peripheral vascular disease category).                                                                                                                                                                                                                                                                                                                                                                                                                                                                                                                                                                                                                        |
| Overall                                                                                                         | Generally, did not focus on inclusion/exclusion of rare conditions or conditions unlikely to be present in an adult working population.                                                                                                                                                                                                                                                                                                                                                                                                                                                                                                                                                                                                                                                                                                 |
| Arthritis                                                                                                       | Included only arthritis specified as osteoarthritis or rheumatoid arthritis.                                                                                                                                                                                                                                                                                                                                                                                                                                                                                                                                                                                                                                                                                                                                                            |
| Osteoporosis                                                                                                    | Did not include pathologic fracture codes in the ICD-9-CM list because they sometimes mapped to causes other than osteoporosis, but included osteoporosis both with and without current pathological fracture in the ICD-10-CM list.                                                                                                                                                                                                                                                                                                                                                                                                                                                                                                                                                                                                    |
| Asthma                                                                                                          | Included chronic obstructive asthma.                                                                                                                                                                                                                                                                                                                                                                                                                                                                                                                                                                                                                                                                                                                                                                                                    |
| Chronic respiratory disease (chronic obstructive pulmonary disease, chronic respiratory distress, or emphysema) | Included obstructive chronic bronchitis, bronchiectasis (all obstructive), and chronic respiratory failure; excluded acute respiratory failure; added occupational chronic respiratory diseases based on review of Charlson/Elixhauser codes listed in Quan et al (2005). <sup>9</sup>                                                                                                                                                                                                                                                                                                                                                                                                                                                                                                                                                  |
| Angina                                                                                                          | Excluded ICD-10-CM codes for atherosclerotic heart disease with angina (included in congestive heart failure or heart disease category).                                                                                                                                                                                                                                                                                                                                                                                                                                                                                                                                                                                                                                                                                                |
| Congestive heart failure or heart disease                                                                       | Included: heart failure, acute/chronic ischemic heart disease. Excluded: hypertension, arrhythmias, other acute/subacute heart disease, cardiomyopathy without heart failure, valve disorders.                                                                                                                                                                                                                                                                                                                                                                                                                                                                                                                                                                                                                                          |
| Myocardial infarction (heart attack)                                                                            | Included acute myocardial infarction and old (documented history of) myocardial infarction.                                                                                                                                                                                                                                                                                                                                                                                                                                                                                                                                                                                                                                                                                                                                             |
| Neurological disease                                                                                            | Included: multiple sclerosis, Parkinson's, parkinsonism, Huntington's and other choreas, epilepsy and recurrent seizures, spinocerebellar disease, anterior horn cell disease. After review of Charlson/Elixhauser codes, we added: paralysis codes (unless already in the stroke or transient ischemic attack category, and cauda equina syndrome [344.6x/G83.4] was excluded as a repairable surgical emergency); cerebral palsy codes; Elixhauser codes for "other neurological disorders" except unspecified encephalopathy (348.3x/G93.4x, G32.89), subacute spinal cord degeneration in diseases classified elsewhere (336.2/G32.0), nonspecific speech disturbances (784.3/R47.x), and nonspecific convulsions (780.3x/R56.x). (In contrast, Gabbe et al [2013] <sup>16</sup> included the entire neurological disease chapter.) |
| Stroke or transient ischemic attack                                                                             | Included: subarachnoid hemorrhage, intracerebral hemorrhage, cerebral infarction, transient ischemic attack, late effects/sequelae. Excluded: spinal infarction, retinal infarction, transient global amnesia. Relied heavily on the American Heart Association/American Stroke Association expert consensus document, Sacco et al (2013), <sup>26</sup> but added a few codes to improve cross-lexicon concordance after translation/back-translation (G46.0, G46.1, G46.2, I67.84x).                                                                                                                                                                                                                                                                                                                                                  |

|                                                                                        |                                                                                                                                                                                                                                                                                                                                                                                                                                                                                                                                                                                                                                   |
|----------------------------------------------------------------------------------------|-----------------------------------------------------------------------------------------------------------------------------------------------------------------------------------------------------------------------------------------------------------------------------------------------------------------------------------------------------------------------------------------------------------------------------------------------------------------------------------------------------------------------------------------------------------------------------------------------------------------------------------|
| Peripheral vascular disease                                                            | Included unspecified peripheral vascular disease, atherosclerosis of native arteries/bypass grafts of extremities. Excluded phlebitis/thrombophlebitis (could be acute and/or due to other cause).                                                                                                                                                                                                                                                                                                                                                                                                                                |
| Diabetes (type I or II)                                                                | Included primary and secondary diabetes mellitus.                                                                                                                                                                                                                                                                                                                                                                                                                                                                                                                                                                                 |
| Upper gastrointestinal disease                                                         | Included: reflux, esophagitis, gastritis, upper gastrointestinal ulcer. Excluded: hernia, gall bladder disease, bowel disease (e.g., Crohn's, ulcerative colitis, irritable bowel syndrome).                                                                                                                                                                                                                                                                                                                                                                                                                                      |
| Depression                                                                             | Included bipolar disorders (excluded codes indicating history of manic episodes only). Included the subset of affective personality disorder ICD-9-CM codes that mapped to F34.x in ICD-10-CM. Excluded adjustment disorders from both lexicons because ICD-10-CM doesn't distinguish acute vs chronic.                                                                                                                                                                                                                                                                                                                           |
| Anxiety or panic disorder                                                              | Included obsessive-compulsive disorder and post-traumatic stress disorder.                                                                                                                                                                                                                                                                                                                                                                                                                                                                                                                                                        |
| Visual impairment                                                                      | Included blindness and low vision. Excluded visual disturbances (e.g., color blindness, correctable conditions). Groll et al (2005) <sup>10</sup> specifically mentioned this category as including cataracts, glaucoma, and macular degeneration. We excluded codes for these diseases because, in the presence of untreated/chronic visual impairment, there should also be codes for blindness and low vision.                                                                                                                                                                                                                 |
| Hearing impairment                                                                     | Groll et al (2005) <sup>10</sup> specified this category as very hard of hearing, even with hearing aids; however, ICD codes don't indicate degree of hearing impairment or correction of hearing loss.                                                                                                                                                                                                                                                                                                                                                                                                                           |
| Back disease (degenerative disc disease, spinal stenosis, or severe chronic back pain) | Included: degenerative disc disease, displaced disc, spondylosis, spinal stenosis, sciatica, radiculitis, ankylosing spondylitis. Within these included codes: included codes specifying anatomic region as thoracic, lumbar, sacral, or unspecified, and excluded codes specifying anatomic region as coccyx, cervical, or cervicothoracic. Excluded: spondylolysis and spondylolisthesis (these were included by Marcum et al [2018] <sup>14</sup> in their ICD-10-CM list but not their ICD-9-CM list, and were not included by Gabbe et al [2013] <sup>16</sup> or Kumar et al [2016] <sup>11</sup> ), nonspecific back pain. |
| Obesity (body mass index $\geq 30$ )                                                   | Included codes for BMI $\geq 30$ (specified as $> 30$ in Groll et al (2005), <sup>10</sup> but ICD diagnosis codes for obesity included body mass index=30). Excluded overweight $<30$ BMI (in contrast to Kumar et al [2016] <sup>11</sup> ).                                                                                                                                                                                                                                                                                                                                                                                    |

FCI indicates Functional Comorbidity Index; ICD, International Classification of Diseases.

**SUPPLEMENTAL TABLE S3.** FCI Distribution by State, ICD Lexicon, and Calendar Quarter (2015)

| <b>State</b>                                                                                                                   | <b><u>2015 Q1</u></b> | <b><u>ICD-9-CM</u></b>       | <b><u>2015 Q3</u></b> | <b><u>ICD-10-CM</u></b>      |
|--------------------------------------------------------------------------------------------------------------------------------|-----------------------|------------------------------|-----------------------|------------------------------|
|                                                                                                                                | <b>Mean (SD)</b>      | <b>2015 Q2<br/>Mean (SD)</b> | <b>Mean (SD)</b>      | <b>2015 Q4<br/>Mean (SD)</b> |
| Arizona                                                                                                                        | 1.81 (1.59)           | 1.81 (1.60)                  | 1.78 (1.61)           | 1.82 (1.64)                  |
| Colorado                                                                                                                       | 1.76 (1.65)           | 1.77 (1.65)                  | 1.74 (1.66)           | 1.74 (1.64)                  |
| Michigan                                                                                                                       | 2.31 (1.82)           | 2.31 (1.82)                  | 2.28 (1.83)           | 2.34 (1.86)                  |
| New Jersey                                                                                                                     | 1.80 (1.58)           | 1.77 (1.58)                  | 1.71 (1.57)           | 1.77 (1.60)                  |
| New York                                                                                                                       | 1.78 (1.58)           | 1.76 (1.58)                  | 1.71 (1.57)           | 1.76 (1.60)                  |
| Utah                                                                                                                           | 1.49 (1.43)           | 1.46 (1.44)                  | 1.44 (1.42)           | 1.51 (1.45)                  |
| Washington                                                                                                                     | 1.94 (1.69)           | 1.91 (1.71)                  | 1.84 (1.69)           | 1.87 (1.69)                  |
| FCI indicates Functional Comorbidity Index; ICD, International Classification of Diseases; Q, quarter, SD, standard deviation. |                       |                              |                       |                              |

**SUPPLEMENTAL TABLE S4.** FCI Comorbidity Frequencies by ICD Lexicon and Calendar Quarter (2015)

| FCI comorbidity                                                                                        | <b>2015 Q1</b>       | <b>ICD-9-CM</b>      | <b>2015 Q3</b>       | <b>ICD-10-CM</b>     | <b>2015</b>          |
|--------------------------------------------------------------------------------------------------------|----------------------|----------------------|----------------------|----------------------|----------------------|
|                                                                                                        | <b>(N=1,405,729)</b> | <b>2015 Q2</b>       | <b>(N=1,409,944)</b> | <b>2015 Q4</b>       | <b>All quarters</b>  |
|                                                                                                        | <b>Percent (n)</b>   | <b>(N=1,424,145)</b> | <b>Percent (n)</b>   | <b>(N=1,404,902)</b> | <b>(N=5,644,720)</b> |
|                                                                                                        | <b>Percent (n)</b>   |
| Arthritis                                                                                              | 11.52 (162,003)      | 11.54 (164,331)      | 11.18 (157,695)      | 13.60 (191,025)      | 11.96 (675,054)      |
| Osteoporosis                                                                                           | 3.07 (43,150)        | 2.98 (42,487)        | 2.87 (40,441)        | 2.84 (39,831)        | 2.94 (165,909)       |
| Asthma                                                                                                 | 9.78 (137,505)       | 9.63 (137,186)       | 9.36 (131,910)       | 9.06 (127,224)       | 9.46 (533,825)       |
| Chronic respiratory disease                                                                            | 14.34 (201,605)      | 13.64 (194,266)      | 12.51 (176,408)      | 15.38 (216,092)      | 13.97 (788,371)      |
| Angina                                                                                                 | 0.46 (6,440)         | 0.46 (6,549)         | 0.47 (6,568)         | 0.15 (2,079)         | 0.38 (21,636)        |
| Congestive heart failure or heart disease                                                              | 27.27 (383,274)      | 26.49 (377,208)      | 25.36 (357,516)      | 26.00 (365,232)      | 26.28 (1,483,230)    |
| Myocardial infarction                                                                                  | 8.22 (115,552)       | 8.07 (114,987)       | 7.83 (110,388)       | 8.00 (112,373)       | 8.03 (453,300)       |
| Neurological disease                                                                                   | 8.78 (123,368)       | 8.59 (122,389)       | 8.50 (119,876)       | 8.95 (125,786)       | 8.71 (491,419)       |
| Stroke or transient ischemic attack                                                                    | 5.08 (71,371)        | 5.03 (71,672)        | 4.94 (69,581)        | 5.05 (71,015)        | 5.02 (283,639)       |
| Peripheral vascular disease                                                                            | 4.42 (62,122)        | 4.46 (63,488)        | 4.27 (60,151)        | 4.23 (59,358)        | 4.34 (245,119)       |
| Diabetes                                                                                               | 24.68 (346,995)      | 24.53 (349,334)      | 24.14 (340,292)      | 24.46 (343,583)      | 24.45 (1,380,204)    |
| Upper gastrointestinal disease                                                                         | 20.02 (281,454)      | 20.19 (287,595)      | 19.83 (279,612)      | 19.97 (280,567)      | 20.01 (1,129,228)    |
| Depression                                                                                             | 17.77 (249,756)      | 18.05 (256,998)      | 18.11 (255,398)      | 16.35 (229,640)      | 17.57 (991,792)      |
| Anxiety or panic disorder                                                                              | 12.26 (172,370)      | 12.50 (177,969)      | 12.67 (178,681)      | 12.96 (182,051)      | 12.60 (711,071)      |
| Visual impairment                                                                                      | 0.98 (13,820)        | 0.98 (13,890)        | 0.97 (13,609)        | 0.97 (13,643)        | 0.97 (54,962)        |
| Hearing impairment                                                                                     | 1.70 (23,939)        | 1.69 (24,067)        | 1.67 (23,496)        | 1.62 (22,726)        | 1.67 (94,228)        |
| Back disease                                                                                           | 4.32 (60,730)        | 4.37 (62,286)        | 4.36 (61,448)        | 3.88 (54,533)        | 4.23 (238,997)       |
| Obesity                                                                                                | 14.10 (198,252)      | 14.43 (205,555)      | 14.12 (199,090)      | 14.34 (201,531)      | 14.25 (804,428)      |
| FCI indicates Functional Comorbidity Index; ICD, International Classification of Diseases; Q, quarter. |                      |                      |                      |                      |                      |
